# Supplementary figures and images for: Dysregulation of Metabolic Pathways in Circulating Natural Killer Cells Isolated from Inflammatory Bowel Disease Patients
Source: PubMed Central journal article supplement — J Crohns Colitis. 2021 Jan 18;15(8):1316–25. doi: 10.1093/ecco-jcc/jjab014 (PMC8328302; doi:10.1093/ecco-jcc/jjab014), 2021-01-18

# Supplementary Figure 1

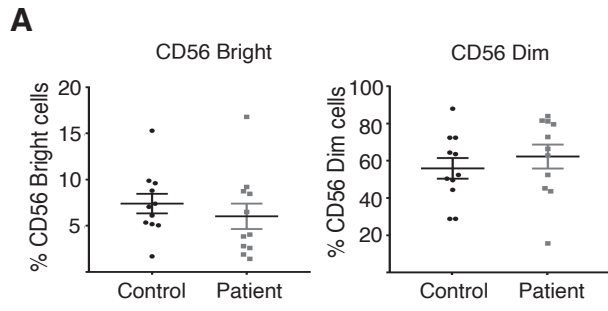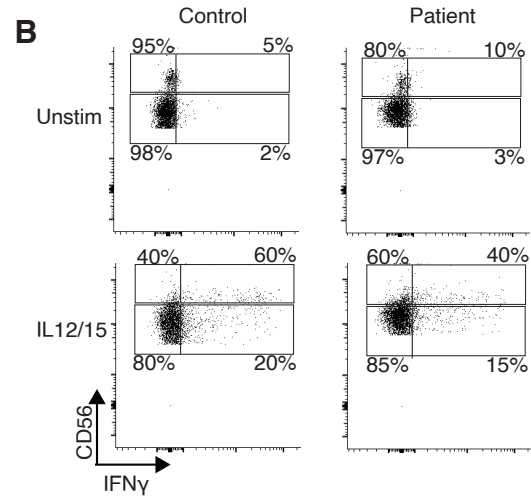

## Supplementary Figure 2

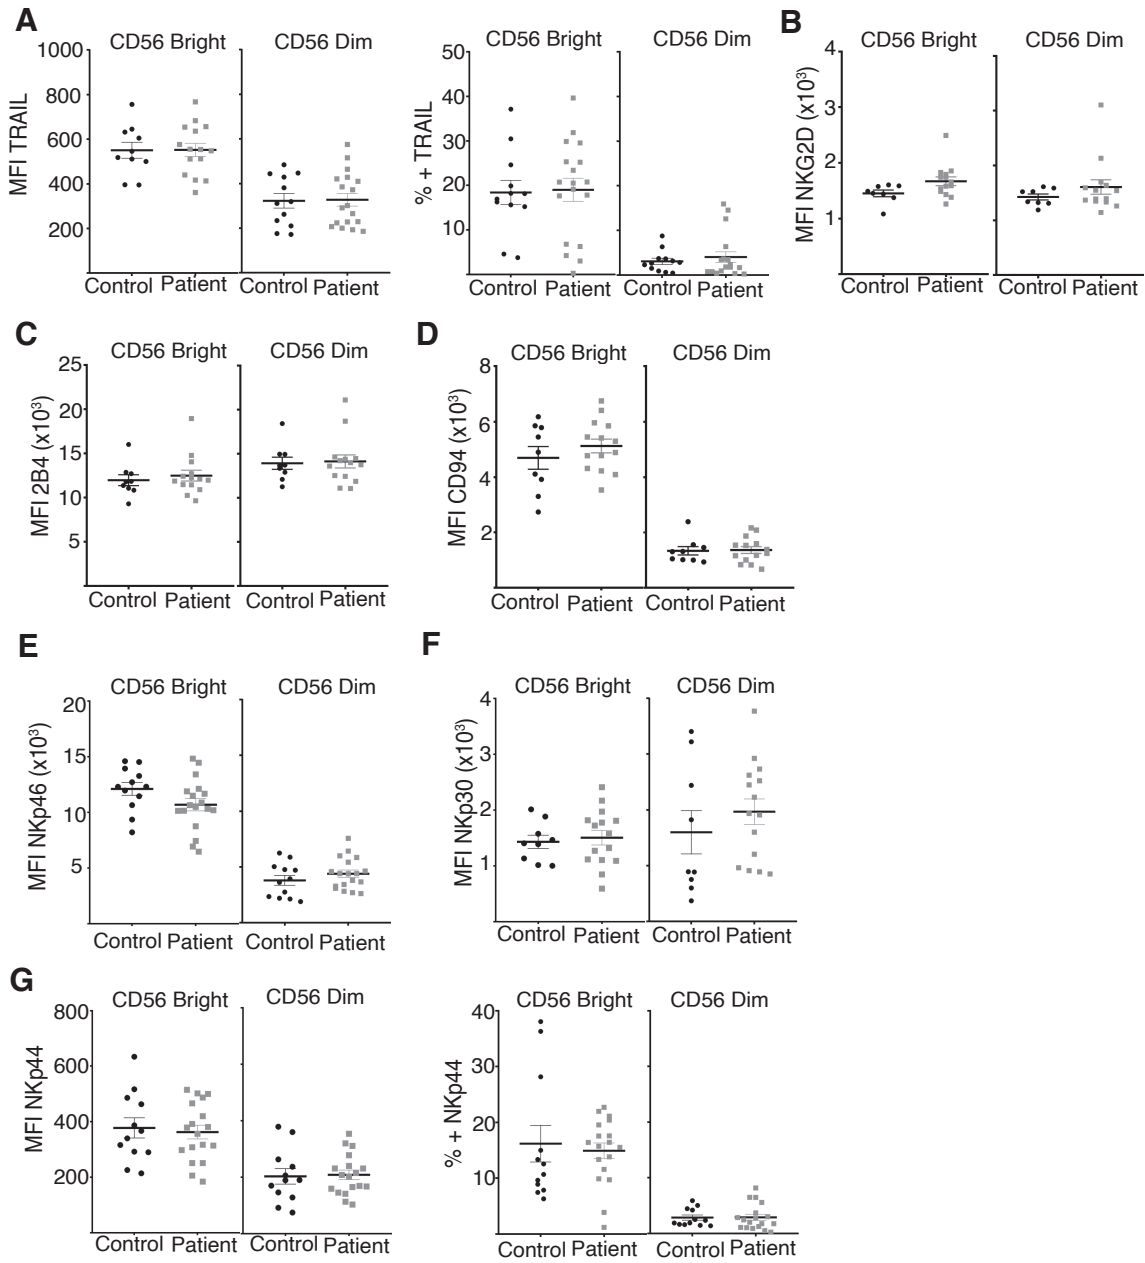

Supplement: jjab014_suppl_supplementary_figures.pdf [file jjab014_suppl_supplementary_figures.pdf]
